# Supplementary material
Source: PubMed Central journal article supplement (PMC2526348)
Supplement: NIHMS61160-supplement-si20060505_112.pdf [file NIHMS61160-supplement-si20060505_112.pdf]

## Supporting Information

for

# O<sub>2</sub> Chemistry of Dicopper Complexes with Alkyltriamine Ligands. Comparing Synergistic Effects on O<sub>2</sub> Binding

Anna Company<sup>a</sup>, Diana Lamata<sup>a</sup>, Albert Poater,<sup>a</sup> Miquel Solà,<sup>a</sup> Elena Rybak-Akimova<sup>\*,b</sup>, Lawrence Que,<sup>c</sup> Xavier Fontrodona<sup>d</sup>, Teodor Parella<sup>e</sup>, Antoni Llobet<sup>f</sup> and Miquel Costas<sup>\*,g,a</sup>

<sup>a</sup>Departament de Química and Institut de Química Computacional, Universitat de Girona, Campus de Montilivi, E-17071 Girona, Catalonia, Spain. <sup>b</sup>Department of Chemistry, Tufts University. <sup>c</sup> Department of Chemistry, University of Minnesota. <sup>d</sup> Serveis Científico-Tècnics, Universitat de Girona, Campus de Montilivi, E-17071 Girona, Spain. <sup>e</sup> Servei de RMN, Universitat Autònoma de Barcelona, Bellaterra, E-08193 Barcelona. <sup>f</sup>Departament de Química, Universitat Autònoma de Barcelona, Bellaterra, E-08193 Barcelona.

## 1) Experimental Section

### Materials and synthesis

Reagents and solvents used were of commercially available reagent quality unless otherwise stated. Solvents were purchased from SDS. Pentane and CH<sub>2</sub>Cl<sub>2</sub> were distilled over CaH<sub>2</sub> under nitrogen. THF was distilled over Na/benzophenone under nitrogen.

### Syntheses of ligands L1 and L2

#### Ligand L1

Ligand L1 was synthesized as previously described.<sup>1</sup>

#### Ligand L2

Ligand L2 was synthesized in a three step synthetic method analogous to L1 summarized in figure 1.

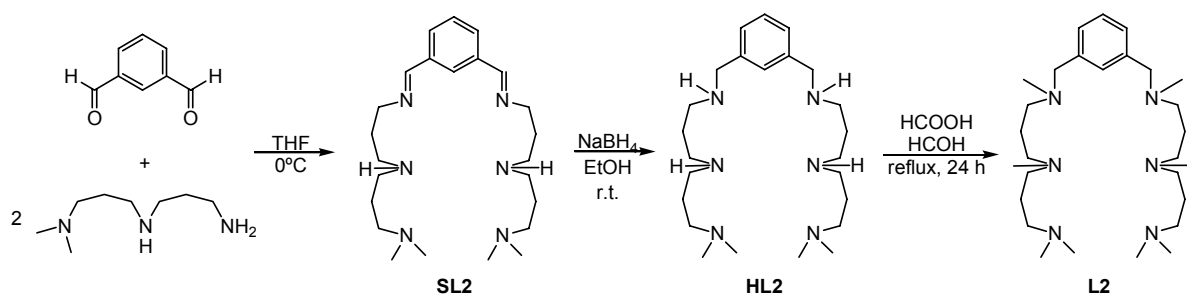

**Figure S1.** Synthetic method used for **L2** synthesis

## SL2.

A solution of N,N-Dimethyldipropylenetriamine (3.6 mL, 20 mmol) in THF (40 mL) is cooled in an ice bath at 0°C and a solution of isophthalaldehyde (1.34 g, 10 mmols) in THF (20 mL) is added dropwise under vigorous stirring. The mixture is left to attain room temperature and it is stirred for further 5 hours. Then, the solvent is removed under reduced pressure and the resultant product is dried under vacuum to obtain 3.87 g (93 %) of a yellow oil corresponding to **SL2**. FT-IR: 2940 – 2723 (C-H<sub>sp3</sub>), 1648 (C=N), 1460 (C=C<sub>arom</sub>) cm<sup>-1</sup>. <sup>1</sup>H-NMR (CDCl<sub>3</sub>, 200 MHz, 298 K) δ, ppm: 8.31, 8.27, 7.75 – 7.64, 7.49 – 7.28, 3.98 – 3.90, 3.76 – 3.66, 3.33 – 3.09, 2.75 – 2.66, 2.35 – 2.28, 2.21 – 2.12, 1.92 – 1.82, 1.66 – 1.52. <sup>13</sup>C-NMR (CDCl<sub>3</sub>, 50 MHz, 300 K) δ, ppm: 160.88, 142.97, 142.85, 142.56, 136.53, 129.49, 128.80, 127.40, 127.31, 127.00, 126.43, 126.02, 81.82, 81.63, 81.54, 67.89, 59.74, 58.03, 57.79, 57.68, 52.19, 52.09, 51.86, 51.74, 51.50, 48.38, 48.00, 45.62, 45.49, 45.37, 45.34, 28.07, 27.29, 26.84, 25.554, 24.78, 24.53. The assignment of the NMR spectra of **SL2** is complicated due to the existence of an equilibrium between different isomers in solution as shown in Figure 2. ESI-MS (m/z): 417.0 (100) [M+H]<sup>+</sup>.

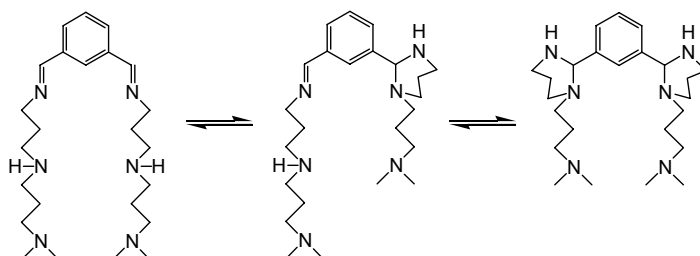

**Figure S2.** Solution equilibrium of the different isomers of **SL2**

## HL2.

3.15 g of **SL2** (7.6 mmols) are dissolved in ethanol absolute (75 mL) and 1.14 g of NaBH<sub>4</sub> are slowly added to the stirred mixture directly as a solid. The mixture is stirred for 12 hours and then 10 mL of water are added to destroy the unreacted NaBH<sub>4</sub>. The solvent is removed under reduced pressure and a mixture of a yellow oil and a white solid is obtained. This mixture is treated with 75 mL of CH<sub>2</sub>Cl<sub>2</sub> and 20 mL of water and the aqueous phase is extracted with 2 x 40 mL of CH<sub>2</sub>Cl<sub>2</sub>. The organic layers are dried over MgSO<sub>4</sub> and the solvent is removed to dryness to give 3.13 g (98%) of a yellow oil. FT-IR: 3277 (N-H), 2935 – 2765 (C-H<sub>sp3</sub>), 1460 (C=C<sub>arom</sub>) cm<sup>-1</sup>. <sup>1</sup>H-NMR (CDCl<sub>3</sub>, 200 MHz, 300 K) δ, ppm: 7.28 – 7.21 (m, 4 H, Ar-H), 3.78 (s, 4H, ArCH<sub>2</sub>), 2.73 – 2.62 (m, 12 H, N-CH<sub>2</sub>), 2.31– 2.27 (m, 4 H, N-CH<sub>2</sub>), 2.21 (s, 12 H, N-CH<sub>3</sub>), 1.91 (br.s, 4 H, N-H), 1.75 – 1.63 (m, 8 H, C-CH<sub>2</sub>-C). <sup>13</sup>C-NMR (CDCl<sub>3</sub>, 50 MHz, 300 K) δ, ppm: 140.57 (arC-CH<sub>2</sub>), 128.34, 127.75, 126.56 (arC-H), 58.00, 54.01, 48.47, 47.95 (N-CH<sub>2</sub>-C), 45.49 (N-(CH<sub>3</sub>)<sub>2</sub>), 30.30, 28.09 (C-CH<sub>2</sub>-C). ESI-MS (m/z): 421.0 (100) [M+H]<sup>+</sup>.

## L2.

2.5 g of **L2** (5.9 mmols), HCHO (37%, 25 mL) and HCOOH (85%, 20 mL) are refluxed for 24 h. Then, the solution is cooled and the solvent is removed to obtain a residue which is made basic by the addition of an aqueous solution of NaOH 3M until pH > 14 (~ 25 mL). The resultant suspension is extracted with CH<sub>2</sub>Cl<sub>2</sub> (3 x 50 mL), the organic phases are dried over MgSO<sub>4</sub> and the solvent is removed under reduced pressure. The product is dried under vacuum to give 2.09 g (98%) of a yellow oil. The product is purified over an alumina column chromatography using dichloromethane:methanol 9:1 as eluent to give 1.31 g of the pure product (46%). FT-IR: 2944 – 2762 (C-H<sub>sp3</sub>), 1459 (C=C<sub>arom</sub>) cm<sup>-1</sup>. <sup>1</sup>H-NMR (CDCl<sub>3</sub>, 200 MHz, 300 K) δ, ppm: 7.14 – 7.11 (m, 4 H, Ar-H), 3.39 (s, 4H, ArCH<sub>2</sub>), 2.31 – 2.23 (m, 16H, N-CH<sub>2</sub>-C), 2.15 – 2.12 (24 H, CH<sub>3</sub>), 1.60 – 1.54 (m, 8H, C-CH<sub>2</sub>-C). <sup>13</sup>C-NMR (CDCl<sub>3</sub>, 50 MHz, 300 K) δ, ppm: 138.98 (arC-CH<sub>2</sub>), 129.68, 128.00, 127.59 (arC-H), 62.24 (Ar-CH<sub>2</sub>), 57.92, 55.83, 55.78, 55.69 (N-CH<sub>2</sub>-C), 45.46 (N-(CH<sub>3</sub>)<sub>2</sub>), 42.25, 42.16 (N-CH<sub>3</sub>), 25.58, 25.26 (C-CH<sub>2</sub>-C). ESI-MS (m/z): 477.2 (100) [M+H]<sup>+</sup>.

### Syntheses of complexes.

**[Cu<sup>I</sup><sub>2</sub>(L1)](CF<sub>3</sub>SO<sub>3</sub>)<sub>2</sub> (**1**(CF<sub>3</sub>SO<sub>3</sub>)<sub>2</sub>).** A solution of Cu(CH<sub>3</sub>CN)<sub>4</sub>CF<sub>3</sub>SO<sub>3</sub> (160 mg, 0.42 mmols) in THF (1.5 mL) is added dropwise to a stirred solution of **L1** (117 mg, 0.21 mmols) in THF (1 mL). The reaction mixture is stirred for 1 hour to allow the complete precipitation of a fine solid which corresponds to **1**(CF<sub>3</sub>SO<sub>3</sub>)<sub>2</sub>. The solvent is decanted and the precipitate is dried under vacuum to yield 170 mg (82 %) of a pale-yellow powder. Anal. Calcd for C<sub>36</sub>H<sub>58</sub>Cu<sub>2</sub>F<sub>6</sub>N<sub>6</sub>O<sub>6</sub>S<sub>2</sub> (MW = 976.10 g/mol): C, 44.30; H, 5.99; N, 8.61; S, 6.57 %. Found: C, 44.25; H, 6.06; N, 8.90; S, 6.98 %. FT-IR: 2863 (C-H<sub>sp3</sub>), 1475 (C=C<sub>arom</sub>), 1247, 1222, 1151, 1026, 634 (CF<sub>3</sub>SO<sub>3</sub>) cm<sup>-1</sup>.

**[Cu<sup>I</sup><sub>2</sub>(L1)](BArF)<sub>2</sub> (**1**(BArF)<sub>2</sub>).** To a vigorous stirred mixture of **1**(CF<sub>3</sub>SO<sub>3</sub>)<sub>2</sub> (154 mg, 0.16 mmols) in CH<sub>2</sub>Cl<sub>2</sub> (1.5 mL) is added a solution of NaBArF (279 mg, 0.31 mmols) in CH<sub>2</sub>Cl<sub>2</sub>. The mixture is stirred for 2 hours and then filtered through celite to remove the precipitated NaCF<sub>3</sub>SO<sub>3</sub>. The colorless filtrate is layered with pentane and after 5 days white crystals suitable for X-Ray analysis appear. The liquid is decanted and the crystalline material is dried under vacuum to yield 167 mg (44 %). Anal. Calcd for C<sub>98</sub>H<sub>82</sub>B<sub>2</sub>Cu<sub>2</sub>F<sub>48</sub>N<sub>6</sub> (MW = 2404.38 g/mol): C, 48.95; H, 3.44; N, 3.50 %. Found: C, 49.20; H, 3.62; N, 3.40 %. FT-IR: 2857 (C-H<sub>sp3</sub>), 1473 (C=C<sub>arom</sub>), 1609, 1353, 1272, 1113, 901, 670 (BArF) cm<sup>-1</sup>.

**[Cu<sup>I</sup><sub>2</sub>(L2)](CF<sub>3</sub>SO<sub>3</sub>)<sub>2</sub> (**2**(CF<sub>3</sub>SO<sub>3</sub>)<sub>2</sub>).** A solution of Cu(CH<sub>3</sub>CN)<sub>4</sub>CF<sub>3</sub>SO<sub>3</sub> (157 mg, 0.42 mmols) in THF (1.5 mL) is added dropwise to a stirred solution of **L2** (99.5 mg, 0.21 mmols) in THF (1 mL). The reaction mixture is stirred for 1 hour to allow the complete precipitation of a fine solid which corresponds to **2**(CF<sub>3</sub>SO<sub>3</sub>)<sub>2</sub>. The solvent is decanted and the precipitate is dried under vacuum to yield 156 mg (83 %) of a pale-yellow powder. Anal. Calcd for C<sub>30</sub>H<sub>56</sub>Cu<sub>2</sub>F<sub>6</sub>N<sub>6</sub>O<sub>6</sub>S<sub>2</sub>·2H<sub>2</sub>O (MW = 938.05 g/mol): C, 38.41; H, 6.45; N, 8.96; S, 6.84 %. Found: C, 38.62; H, 6.65; N, 9.11; S, 6.81 %. FT-IR: 2976 - 2800 (C-H<sub>sp3</sub>), 1471 (C=C<sub>arom</sub>), 1254, 1224, 1143, 1027, 635 (CF<sub>3</sub>SO<sub>3</sub>) cm<sup>-1</sup>.

**[Cu<sup>I</sup><sub>2</sub>(L2)](BArF)<sub>2</sub> (2(BArF)<sub>2</sub>).** To a vigorous stirred mixture of **2(CF<sub>3</sub>SO<sub>3</sub>)<sub>2</sub>** (88 mg, 0.098 mmols) in CH<sub>2</sub>Cl<sub>2</sub> (1.5 mL) is added a solution of NaBArF (173 mg, 0.20 mmols). The mixture is stirred for 2 hours and then filtered through celite to remove the precipitated NaCF<sub>3</sub>SO<sub>3</sub>. The colorless filtrate is layered with pentane and after 5 days pale-orange crystals appear. The liquid is decanted and the crystalline material is dried under vacuum to yield 197 mg (87 %). Anal. Calcd for C<sub>92</sub>H<sub>80</sub>B<sub>2</sub>Cu<sub>2</sub>F<sub>48</sub>N<sub>6</sub> (MW = 2330.30 g/mol): C, 47.42; H, 3.46; N, 3.61 %. Found: C, 47.39; H, 3.69; N, 3.54 %. FT-IR: 2973 - 2869 (C-H<sub>sp3</sub>), 1465 (C=C<sub>arom</sub>), 1612, 1354, 1273, 1109, 884, 668 (BArF) cm<sup>-1</sup>.

**[Cu<sup>I</sup><sub>2</sub>(L2)](SbF<sub>6</sub>)<sub>2</sub> (2(SbF<sub>6</sub>)<sub>2</sub>).** A solution of Cu(CH<sub>3</sub>CN)<sub>4</sub>SbF<sub>6</sub> (77.4 mg, 0.17 mmols) in THF (1 mL) is added dropwise to a stirred solution of **L2** (39.8 mg, 0.08 mmols) in THF (1 mL). The reaction mixture is stirred for 1 hour to allow the complete precipitation of a fine white solid which corresponds to **2(SbF<sub>6</sub>)<sub>2</sub>**. The solvent is decanted, the precipitate is dried under vacuum and the compound is redissolved in CH<sub>2</sub>Cl<sub>2</sub>. Slow diethyl ether diffusion over this solution affords 64.5 mg of white crystals suitable for X-Ray analysis (72 %). Anal. Calcd for C<sub>28</sub>H<sub>56</sub>Cu<sub>2</sub>F<sub>12</sub>N<sub>6</sub>Sb<sub>2</sub>·H<sub>2</sub>O (MW = 1111.41 g/mol): C, 30.26; H, 5.44; N, 7.56 %. Found: C, 30.21; H, 5.29; N, 7.12 %. FT-IR: 2975 - 2850 (C-H<sub>sp3</sub>), 1464 (C=C<sub>arom</sub>), 652 (SbF<sub>6</sub>) cm<sup>-1</sup>.

## 2) Crystal data for 1(BArF)<sub>2</sub> and 2(SbF<sub>6</sub>)<sub>2</sub>

**Table S1.** Crystal data for 1(BArF)<sub>2</sub> and 2(SbF<sub>6</sub>)<sub>2</sub>

| Compound                          | 1(BArF) <sub>2</sub>                                                                          | 2(SbF <sub>6</sub> ) <sub>2</sub>                                                              |
|-----------------------------------|-----------------------------------------------------------------------------------------------|------------------------------------------------------------------------------------------------|
| Empirical formula                 | C <sub>98</sub> H <sub>82</sub> B <sub>2</sub> Cu <sub>2</sub> F <sub>48</sub> N <sub>6</sub> | C <sub>28</sub> H <sub>56</sub> Cu <sub>2</sub> F <sub>12</sub> N <sub>6</sub> Sb <sub>2</sub> |
| Formula weight                    | 2404.40                                                                                       | 1075.37                                                                                        |
| Temperature                       | 100(2) K                                                                                      | 100(2) K                                                                                       |
| Wavelength                        | 0.71073 Å                                                                                     | 0.71073 Å                                                                                      |
| Crystal system                    | Monoclinic                                                                                    | Monoclinic                                                                                     |
| Space group                       | <i>P</i> 21/ <i>n</i>                                                                         | <i>P</i> 21/ <i>c</i>                                                                          |
| Unit cell dimensions              |                                                                                               |                                                                                                |
| a                                 | 13.073(5) Å                                                                                   | 16.264(4) Å                                                                                    |
| alpha                             | 90°                                                                                           | 90°                                                                                            |
| b                                 | 27.978(12) Å                                                                                  | 15.169(4) Å                                                                                    |
| beta                              | 96.633(7)°                                                                                    | 103.776(4)°                                                                                    |
| c                                 | 13.464 Å                                                                                      | 17.642(5) Å                                                                                    |
| gamma                             | 90°                                                                                           | 90°                                                                                            |
| Volume                            | 4891(3) Å <sup>3</sup>                                                                        | 4227(2) Å <sup>3</sup>                                                                         |
| Density (calculated)              | 1.633 Mg/m <sup>3</sup>                                                                       | 1.690 Mg/m <sup>3</sup>                                                                        |
| Absorption coefficient            | 0.578 mm <sup>-1</sup>                                                                        | 2.337 mm <sup>-1</sup>                                                                         |
| F(000)                            | 2424                                                                                          | 2136                                                                                           |
| Cell formula units_Z              | 2                                                                                             | 4                                                                                              |
| Crystal size                      | 0.5 x 0.5 x 0.2 mm                                                                            | 0.08 x 0.05 x 0.02 mm                                                                          |
| Theta range for data collection   | 2.42 to 27.97°                                                                                | 2.04 to 28.34 °                                                                                |
| Limiting indices                  | -17<=h<=17, -36<=k<=36, -<br>17<=l<=17                                                        | -21<=h<=21, -20<=k<=20, -<br>23<=l<=23                                                         |
| Reflections collected             | 69618                                                                                         | 62969                                                                                          |
| Independent reflections           | 11668 [R(int) = 0.0488]                                                                       | 10415 [R(int)= 0.0351]                                                                         |
| Completeness to theta             | 99.1% (theta = 27.97°)                                                                        | 98.7% (theta = 28.21°)                                                                         |
| Refinement method                 | Full-matrix least-squares on F <sup>2</sup>                                                   | Full-matrix least-squares on F <sup>2</sup>                                                    |
| Data / restraints / parameters    | 11668 / 30 / 749                                                                              | 10415 / 0 / 587                                                                                |
| Goodness-of-fit on F <sup>2</sup> | 1.163                                                                                         | 1.076                                                                                          |
| Final R indices [I>2sigma(I)]     | R1 = 0.0510, wR2 = 0.1057                                                                     | R1 = 0.0305, wR2 = 0.0772                                                                      |
| R indices (all data)              | R1 = 0.0716, wR2 = 0.1345                                                                     | R1 = 0.0370, wR2 = 0.0797                                                                      |
| Largest diff. peak and hole       | 0.801 and -0.667 e.Å <sup>-3</sup>                                                            | 1.403 and -0.872 e.Å <sup>-3</sup>                                                             |

**Table S2.** Selected bond lengths (Å) and angles (°) for **1(BArF)<sub>2</sub>** and **2(SbF<sub>6</sub>)<sub>2</sub>**.

| <b>1(BArF)<sub>2</sub></b> | <b>2(SbF<sub>6</sub>)<sub>2</sub></b> |
|----------------------------|---------------------------------------|
| Cu1-N1 2.007 (3)           | Cu1-N1 1.990 (3)                      |
| Cu1-N2 2.192 (2)           | Cu1-N2 2.120 (3)                      |
| Cu1-N3 1.999 (3)           | Cu1-N3 1.986 (3)                      |
| N1-Cu1-N2 100.98 (10)      | Cu2-N4 1.974 (2)                      |
| N2-Cu1-N3 102.50 (10)      | Cu2-N5 2.100 (3)                      |
| N3-Cu1-N1 156.52 (10)      | Cu2-N6 1.973 (3)                      |
|                            | N1-Cu1-N2 105.59 (11)                 |
|                            | N2-Cu1-N3 105.08 (10)                 |
|                            | N3-Cu1-N1 148.84 (11)                 |
|                            | N4-Cu2-N5 104.95 (12)                 |
|                            | N5-Cu2-N6 104.34 (15)                 |
|                            | N4-Cu2-N6 150.62 (13)                 |

### 3) Stopped-flow kinetic measurements for the reaction of 2(BArF)<sub>2</sub> with O<sub>2</sub>

Kinetic measurements were performed using a Hi-Tech Scientific (Salisbury, Wiltshire, UK) SF-43 multi-mixing anaerobic cryogenic stopped-flow instrument combined with a Hi-Tech Scientific Kinetascan diode array rapid scanning unit. All manipulations of the copper(I) complexes and their solutions were done inside a Vacuum Atmospheres or MBraun glove-box filled with argon. Copper(I) solutions of known concentration were placed in Hamilton gas-tight syringes and loaded into the stopped-flow mixing unit. Saturated solutions of O<sub>2</sub> in acetone (8 mM) were prepared by bubbling dry O<sub>2</sub> gas through argon-saturated acetone in a syringe at 293 K for 15 min. Solutions of O<sub>2</sub> with smaller concentrations were prepared by diluting the 8 mM O<sub>2</sub> solution with argon-saturated acetone using graduated gas-tight syringes. The solutions of copper(I) complex in acetone and O<sub>2</sub> in acetone were separately cooled to a low temperature (193-243 K) and mixed in a 1:1 volume ratio. The mixing cell (1 cm) was maintained to  $\pm 0.1$  K, and the mixing time was  $\sim 5$ -10 ms. Concentrations of all reagents are reported at the onset of the reaction (after mixing) and corrected for the 1:1 dilution. No correction for the temperature contraction of solvent was applied in this work. Dioxygen was always taken in large excess to the copper(I) complex. In all kinetic experiments, a series of 5 - 7 shots gave standard deviations within 5%, with overall reproducibility within 10%. Data analysis was performed with the IS-2 Rapid Kinetics Software (Hi-Tech Scientific) for kinetic traces at a single wavelength or with the Specfit program (BioLogic Science Instruments, Grenoble, France) for global fitting of the spectral changes acquired in a diode array mode.



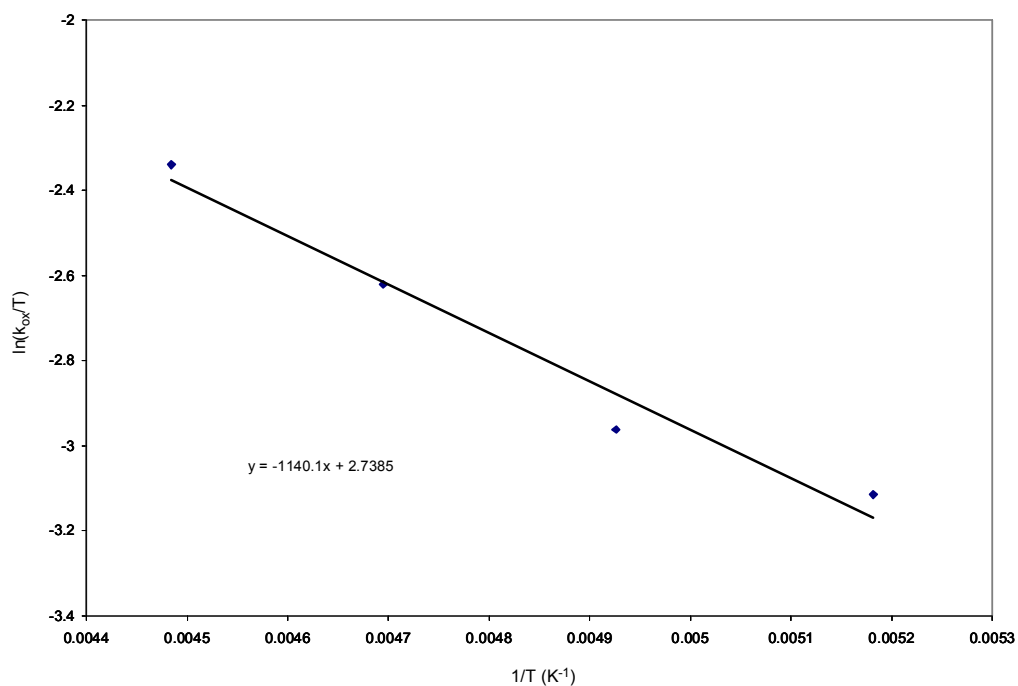

**Figure S3.** Eyring plot for the reaction of **2(BArF)<sub>2</sub>** with O<sub>2</sub> in a temperature range from -80°C to -50°C.  $k_{\text{ox}} = k(\text{obs})/[\text{O}_2]$ ,  $[\text{O}_2] = 0.004 \text{ M}$ .  $\Delta H^\ddagger = 9.5 \pm 2 \text{ kJ}\cdot\text{mol}^{-1}$ ,  $\Delta S^\ddagger = -175 \pm 10 \text{ J}\cdot\text{K}^{-1}\cdot\text{mol}^{-1}$ .

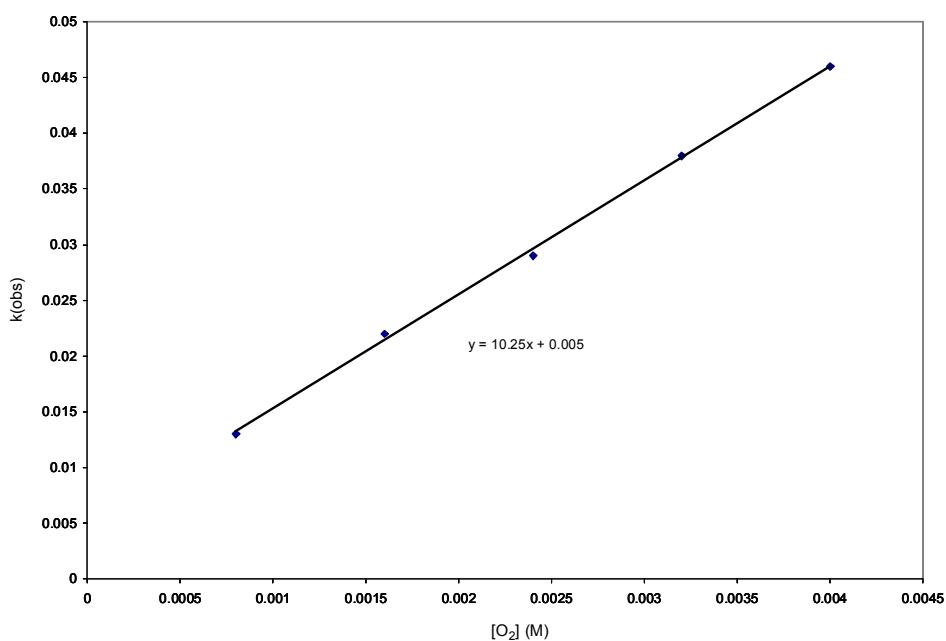

**Figure S4.** Variation of  $k(\text{obs})$  with O<sub>2</sub> concentration (ranging from 0.00075 to 0.004 M) for the reaction of **2(BArF)<sub>2</sub>** with O<sub>2</sub> at -80°C. The plot shows a first order dependence in O<sub>2</sub> concentration.

#### 4) Computational details

All geometry optimizations calculations have been performed at the B3LYP level,<sup>2</sup> using the standard 6-31G\* basis set<sup>3</sup> with the Gaussian03 package.<sup>4</sup> The geometry optimizations were performed without any symmetry constraints, and the nature of the extrema was checked by analytical frequency calculations. The energies discussed throughout the text are electronic energies without any ZPE corrections.

**Table S3.** Main geometrical parameters of the DFT calculated structures (distances in Angstroms and angles in degrees)

|           | $[\text{Cu}_2(\mu\text{-}\eta^2\text{:}\eta^2\text{-O}_2)(\text{L1})]^{2+}$ | $[\text{Cu}_2(\mu\text{-O})_2(\text{L1})]^{2+}$ | $[\text{Cu}_2(\mu\text{-}\eta^2\text{:}\eta^2\text{-O}_2)(\text{L2})]^{2+}$ | $[\text{Cu}_2(\mu\text{-O})_2(\text{L2})]^{2+}$ |
|-----------|-----------------------------------------------------------------------------|-------------------------------------------------|-----------------------------------------------------------------------------|-------------------------------------------------|
| Cu1...Cu2 | 3.603                                                                       | 2.810                                           | 3.636                                                                       | 2.831                                           |
| O1-O2     | 1.443                                                                       | 2.230                                           | 1.438                                                                       | 2.227                                           |
| Cu1-N1    | 2.326                                                                       | 4.784                                           | 2.087                                                                       | 2.014                                           |
| Cu1-N2    | 2.026                                                                       | 2.008                                           | 2.044                                                                       | 2.001                                           |
| Cu1-N3    | 2.101                                                                       | 1.998                                           | 2.319                                                                       | 2.714                                           |
| Cu2-N4    | 3.303                                                                       | 3.647                                           | 2.430                                                                       | 4.500                                           |
| Cu2-N5    | 2.013                                                                       | 2.005                                           | 2.056                                                                       | 2.014                                           |
| Cu2-N6    | 2.016                                                                       | 2.011                                           | 2.029                                                                       | 1.998                                           |
| Cu1-O1    | 2.039                                                                       | 1.793                                           | 2.006                                                                       | 1.810                                           |
| Cu1-O2    | 1.892                                                                       | 1.794                                           | 1.938                                                                       | 1.805                                           |
| Cu2-O1    | 1.894                                                                       | 1.798                                           | 1.929                                                                       | 1.790                                           |
| Cu2-O2    | 1.942                                                                       | 1.789                                           | 1.978                                                                       | 1.800                                           |

**Table S4.** XYZ coordinates and energies of the calculated  $[\text{Cu}_2(\mu\text{-}\eta^2\text{:}\eta^2\text{-O}_2)(\text{L2})]^{2+}$  and  $[\text{Cu}_2(\mu\text{-O})_2(\text{L2})]^{2+}$  isomers of **3**.

| $[\text{Cu}_2(\mu\text{-}\eta^2\text{:}\eta^2\text{-O}_2)(\text{L2})]^{2+}$ | <b>E=-4859.722917 a. u.</b> | $[\text{Cu}_2(\mu\text{-O})_2(\text{L2})]^{2+}$ | <b>E= -4859.7364318 a. u.</b> |             |             |
|-----------------------------------------------------------------------------|-----------------------------|-------------------------------------------------|-------------------------------|-------------|-------------|
| Cu -1.83866600                                                              | -0.49542700                 | -0.09246600                                     | Cu -0.45413000                | -1.52805100 | -0.23941200 |
| Cu 1.79655500                                                               | -0.49456700                 | -0.16558000                                     | Cu 2.11338500                 | -0.37218900 | 0.05386700  |
| N -2.48631400                                                               | -2.08942600                 | -1.27305400                                     | N -1.32433700                 | -2.26164400 | -1.88124900 |
| N -2.90381800                                                               | 1.49303200                  | -0.62969600                                     | N -4.31571800                 | 0.63679400  | 0.58880200  |
| N 3.05077200                                                                | 1.54411300                  | 0.25209600                                      | N 1.44917400                  | 2.23874000  | -0.27616000 |
| N 2.81459500                                                                | -1.34730600                 | -1.69951300                                     | N 3.67364800                  | -0.47268100 | -1.21466800 |
| N -2.89632800                                                               | -0.87946900                 | 1.61447200                                      | N -1.77298500                 | -2.07823600 | 1.18042300  |
| N 2.55041700                                                                | -1.50853900                 | 1.45641700                                      | N 3.08918800                  | 0.08357900  | 1.74043300  |
| O -0.05744600                                                               | -0.45988200                 | -0.85474700                                     | O 0.61873500                  | -0.78622900 | 0.98684900  |
| O 0.03446800                                                                | -0.17869000                 | 0.55246500                                      | O 1.04503600                  | -1.16455900 | -1.16613600 |
| C 2.70334200                                                                | 1.78092700                  | 1.68332400                                      | C 0.83400600                  | 2.43165400  | 1.05820200  |
| C 3.16792100                                                                | 0.70218900                  | 2.67330900                                      | C 1.79799600                  | 2.29898800  | 2.24477400  |
| C 2.43136400                                                                | -0.64119800                 | 2.67447100                                      | C 2.20273000                  | 0.88429900  | 2.66737400  |
| H 3.14714200                                                                | 2.73745300                  | 2.00440700                                      | H 0.35567600                  | 3.42082000  | 1.11484600  |
| H 1.61707300                                                                | 1.89632700                  | 1.74248300                                      | H 0.04044800                  | 1.68948500  | 1.16670400  |
| H 2.99112400                                                                | 1.11843000                  | 3.67319500                                      | H 1.27138200                  | 2.70157300  | 3.11983000  |

|   |             |             |             |   |             |             |             |
|---|-------------|-------------|-------------|---|-------------|-------------|-------------|
| H | 4.25219800  | 0.56144100  | 2.62641000  | H | 2.66887500  | 2.95152600  | 2.12996900  |
| H | 1.36105300  | -0.45312200 | 2.80482900  | H | 1.30736300  | 0.27975400  | 2.81958800  |
| H | 2.76635300  | -1.22603400 | 3.54429500  | H | 2.73580900  | 0.93938800  | 3.62635600  |
| C | 4.17331500  | -1.83444800 | -1.29021400 | C | 4.88845800  | 0.32652500  | -0.85406600 |
| C | 4.21904200  | -2.72490900 | -0.04353400 | C | 5.36671900  | 0.17496900  | 0.58407700  |
| C | 3.93904000  | -2.03429400 | 1.29743200  | C | 4.40649000  | 0.78146000  | 1.60058300  |
| H | 4.79864000  | -0.95320900 | -1.13502200 | H | 4.64913900  | 1.37613300  | -1.04863000 |
| H | 4.60283900  | -2.38593000 | -2.13856400 | H | 5.68844400  | 0.03892200  | -1.54864700 |
| H | 3.59065700  | -3.61227900 | -0.17174300 | H | 5.62599800  | -0.86118500 | 0.82378300  |
| H | 5.24275100  | -3.11344500 | 0.01782800  | H | 6.30732200  | 0.73203100  | 0.66625900  |
| H | 4.63589300  | -1.20601600 | 1.42755100  | H | 4.20363300  | 1.81490100  | 1.31751600  |
| H | 4.13940600  | -2.74256900 | 2.11487500  | H | 4.87437400  | 0.79893600  | 2.59382100  |
| C | -3.13431600 | 0.37434000  | 2.41006300  | C | -1.87605400 | -1.05336000 | 2.32596500  |
| C | -3.16671800 | 2.24778700  | 0.62896800  | C | -3.67929100 | 0.87949900  | 1.89554100  |
| C | -3.91672300 | 1.49426100  | 1.72566300  | C | -3.21557400 | -0.36721600 | 2.67394100  |
| H | -4.12105400 | 2.23117600  | 2.51233200  | H | -3.04148300 | -0.01450600 | 3.69919900  |
| H | -4.90564200 | 1.16249500  | 1.39507700  | H | -4.02202600 | -1.09929200 | 2.77624000  |
| H | -2.14731400 | 0.75433000  | 2.69466300  | H | -1.10230100 | -0.30662300 | 2.13857600  |
| H | -3.65130700 | 0.08614700  | 3.33704600  | H | -1.57008800 | -1.59998400 | 3.22265200  |
| H | -3.73453100 | 3.16003900  | 0.38603300  | H | -4.37088100 | 1.43485400  | 2.55557200  |
| H | -2.20183400 | 2.56998100  | 1.02616600  | H | -2.81599600 | 1.53255800  | 1.73539400  |
| C | -3.88484400 | -2.53134500 | -0.99264700 | C | -2.77761100 | -2.61533300 | -1.78423300 |
| C | -4.19362200 | -2.79730400 | 0.48208400  | C | -3.16335500 | -3.37852300 | -0.52514200 |
| C | -4.21200900 | -1.56184400 | 1.38440300  | C | -3.13152300 | -2.48923800 | 0.71237100  |
| H | -4.08724600 | -3.44164000 | -1.57610900 | H | -3.03433300 | -3.19165800 | -2.68199100 |
| H | -5.20729800 | -3.21424900 | 0.51783000  | H | -4.20273900 | -3.70267800 | -0.65236300 |
| H | -4.62143800 | -1.83941500 | 2.36653700  | H | -3.63088300 | -2.99828700 | 1.54623200  |
| H | -4.55572300 | -1.75480800 | -1.37191000 | H | -3.34034400 | -1.67771000 | -1.82095700 |
| H | -3.55204100 | -3.58480700 | 0.89021600  | H | -2.58639200 | -4.30169600 | -0.40561000 |
| H | -4.89687000 | -0.82921800 | 0.95526800  | H | -3.66749500 | -1.56595500 | 0.48962100  |
| C | -0.13524000 | 5.22149500  | -0.04416400 | C | -2.29189600 | 4.77599700  | -1.28007600 |
| C | 1.13159500  | 4.63864300  | 0.01712100  | C | -1.05876300 | 4.15097000  | -1.47507700 |
| C | -1.20432700 | 4.50415400  | -0.57635900 | C | -3.38581300 | 4.04754900  | -0.81294900 |
| C | -1.02173100 | 3.19187400  | -1.04064400 | C | -3.27545200 | 2.67327500  | -0.55926200 |
| C | 1.34109600  | 3.34451800  | -0.47493600 | C | -0.91215400 | 2.78666700  | -1.19429200 |
| C | 2.73900500  | 2.78440800  | -0.54622500 | C | 0.40627300  | 2.05366900  | -1.34645500 |
| C | -2.18198000 | 2.40689600  | -1.60261700 | C | -4.51691500 | 1.90360600  | -0.14761400 |
| H | -0.28373300 | 6.23704400  | 0.30975400  | H | -2.40146400 | 5.83512900  | -1.49323100 |
| H | 1.96642100  | 5.20739400  | 0.41838800  | H | -0.21922900 | 4.72681700  | -1.85488500 |
| H | -2.18450600 | 4.96988200  | -0.63902000 | H | -4.33824700 | 4.54876100  | -0.65918100 |
| H | -2.92093600 | 3.11573900  | -2.00329300 | H | -5.16963700 | 2.58200000  | 0.43131400  |
| H | -1.85189600 | 1.77699200  | -2.43451500 | H | -5.08123700 | 1.65074700  | -1.05484600 |
| C | 0.25861600  | 2.63837200  | -1.00605300 | C | -2.03364400 | 2.06568200  | -0.75760200 |
| H | 3.44184400  | 3.57170800  | -0.23493700 | H | 0.88082700  | 2.32757900  | -2.29455300 |
| H | 2.97933100  | 2.54539600  | -1.58807100 | H | 0.19679800  | 0.98441000  | -1.39932000 |
| H | 0.40707300  | 1.64343000  | -1.40903400 | H | -1.93703700 | 1.00076300  | -0.55425500 |
| C | 2.02161400  | -2.48348000 | -2.23818100 | C | 4.00714400  | -1.92611900 | -1.29264900 |
| C | -2.38033900 | -1.71961900 | -2.70806300 | C | -1.18088300 | -1.24630400 | -2.97058400 |
| H | 2.55566300  | -2.96411200 | -3.06852900 | H | 4.78667400  | -2.09171300 | -2.04553000 |
| H | 1.83777600  | -3.22944200 | -1.46390800 | H | 4.36976400  | -2.29059600 | -0.33104000 |
| H | -3.08374400 | -0.91979700 | -2.94092900 | H | -1.72767600 | -0.34022300 | -2.70070000 |
| H | -2.60532200 | -2.58043200 | -3.35219600 | H | -1.59253700 | -1.65173300 | -3.90190500 |
| H | 1.06493400  | -2.10876500 | -2.60208800 | H | 3.10810700  | -2.47626000 | -1.56912000 |
| H | -1.36721500 | -1.37124000 | -2.91888100 | H | -0.12804800 | -1.00776300 | -3.10323700 |
| C | 2.97636700  | -0.36302200 | -2.80576600 | C | 3.23333000  | -0.02625500 | -2.56941900 |
| H | 3.58047100  | 0.47930700  | -2.47002400 | H | 2.96665500  | 1.03010200  | -2.53347800 |
| H | 3.46896800  | -0.82835500 | -3.66958100 | H | 4.05010100  | -0.17174000 | -3.28601600 |
| H | 1.99389000  | 0.00361900  | -3.11143800 | H | 2.36588200  | -0.60797800 | -2.87470100 |
| C | -1.55458700 | -3.22166500 | -1.03708300 | C | -0.52666600 | -3.47008300 | -2.24855900 |
| H | -1.61371600 | -3.56314700 | -0.00344400 | H | -0.65737200 | -4.25380200 | -1.50017600 |
| H | -1.79847000 | -4.06688900 | -1.69555300 | H | -0.85965100 | -3.85391400 | -3.21957300 |
| H | -0.53868600 | -2.88652400 | -1.23291900 | H | 0.52585100  | -3.19455400 | -2.30359700 |
| C | -4.20144300 | 1.18966500  | -1.28358500 | C | 2.32356000  | 3.38130200  | -0.60222700 |

|   |             |             |             |   |             |             |             |
|---|-------------|-------------|-------------|---|-------------|-------------|-------------|
| H | -4.02506000 | 0.80654600  | -2.29094400 | H | 1.78802200  | 4.34249800  | -0.58496400 |
| H | -4.76399800 | 0.44417400  | -0.72205400 | H | 3.14986700  | 3.45378100  | 0.10993000  |
| H | -4.82300500 | 2.09279600  | -1.37366900 | H | 2.75403500  | 3.24880400  | -1.59935400 |
| C | -2.05002400 | -1.75312700 | 2.47132300  | C | 3.29397000  | -1.24814500 | 2.38862400  |
| H | -1.82149100 | -2.68972000 | 1.96248900  | H | 3.94642200  | -1.87603400 | 1.78159000  |
| H | -1.11657300 | -1.23640100 | 2.69439400  | H | 3.75349300  | -1.11961300 | 3.37550400  |
| H | -2.56466400 | -1.98468800 | 3.41346900  | H | 2.32647800  | -1.73661800 | 2.49719500  |
| C | 1.63577200  | -2.66370400 | 1.65779800  | C | -1.03284200 | -3.26879300 | 1.70717000  |
| H | 0.61172400  | -2.30159100 | 1.71597400  | H | -0.07012600 | -2.94188600 | 2.09917300  |
| H | 1.71198900  | -3.36115900 | 0.82260300  | H | -1.61028300 | -3.75058900 | 2.50441300  |
| H | 1.88916100  | -3.20342200 | 2.58080500  | H | -0.86292000 | -4.00058900 | 0.91425900  |
| C | 4.52492100  | 1.41616300  | 0.12751600  | C | -5.64716400 | 0.02897900  | 0.76310100  |
| H | 4.89215200  | 0.49719600  | 0.57702800  | H | -6.09182500 | -0.16921600 | -0.21685700 |
| H | 4.80894900  | 1.41944900  | -0.92752100 | H | -5.58349300 | -0.92016000 | 1.30143800  |
| H | 5.03894800  | 2.26112900  | 0.61007000  | H | -6.33350000 | 0.68536400  | 1.32468700  |

**Table S5.** XYZ coordinates and energies of calculated  $[\text{Cu}_2(\mu\text{-}\eta^2\text{:}\eta^2\text{-O}_2)(\text{L}1)]^{2+}$  and  $[\text{Cu}_2(\mu\text{-O})_2(\text{L}1)]^{2+}$ .

| $[\text{Cu}_2(\mu\text{-}\eta^2\text{:}\eta^2\text{-O}_2)(\text{L}1)]^{2+}$ |             |             | <b>E=-5089.5483291 a. u.</b> | $[\text{Cu}_2(\mu\text{-O})_2(\text{L}1)]^{2+}$ |             |             | <b>E=-5089.5736771 a. u.</b> |
|-----------------------------------------------------------------------------|-------------|-------------|------------------------------|-------------------------------------------------|-------------|-------------|------------------------------|
| Cu                                                                          | 1.93580400  | 0.13140800  | -0.44666700                  | Cu                                              | 0.20425900  | 1.40349100  | -0.20233000                  |
| Cu                                                                          | -1.53188500 | -0.83884500 | -0.31027700                  | Cu                                              | -0.43246500 | -1.32597200 | -0.00479400                  |
| N                                                                           | 2.85285600  | -2.00102400 | -0.30171400                  | N                                               | 4.37282000  | -0.57710000 | -1.46150500                  |
| N                                                                           | 2.42186700  | 1.55052200  | 1.02396500                   | N                                               | 0.36792000  | 2.74434400  | 1.26946000                   |
| N                                                                           | -3.54470800 | 1.76856900  | -0.55278900                  | N                                               | -4.06942000 | -1.14412000 | -0.20583900                  |
| N                                                                           | -2.64483800 | -1.56608100 | 1.20572500                   | N                                               | -0.26834900 | -2.57561300 | 1.56268800                   |
| N                                                                           | 3.01003300  | 0.76824100  | -2.04259900                  | N                                               | 0.85771400  | 2.47565500  | -1.76909000                  |
| N                                                                           | -2.46837400 | -1.36798400 | -2.01226500                  | N                                               | -0.88339800 | -2.63615300 | -1.45400800                  |
| O                                                                           | 0.26266100  | -0.38129600 | 0.27367300                   | O                                               | 0.00584700  | 0.08771100  | 1.00067900                   |
| O                                                                           | 0.05027800  | -0.21327700 | -1.14336900                  | O                                               | -0.21532900 | -0.01501600 | -1.21581500                  |
| C                                                                           | -2.94766600 | 2.01954700  | -1.88502500                  | C                                               | -3.83416200 | -0.77326100 | -1.61693400                  |
| C                                                                           | -3.21676600 | 0.97209300  | -2.98229100                  | C                                               | -3.18250900 | -1.82915400 | -2.52893900                  |
| C                                                                           | -2.36863600 | -0.30465700 | -3.07566100                  | C                                               | -1.65536800 | -1.98718900 | -2.59179700                  |
| H                                                                           | -3.32496300 | 2.98323100  | -2.27347800                  | H                                               | -4.79836800 | -0.50551300 | -2.08853700                  |
| H                                                                           | -1.86686400 | 2.13803200  | -1.74690000                  | H                                               | -3.21819300 | 0.13219600  | -1.62050800                  |
| H                                                                           | -2.99754300 | 1.48160500  | -3.92978900                  | H                                               | -3.42329100 | -1.51015400 | -3.55177100                  |
| H                                                                           | -4.28285700 | 0.73926200  | -3.05119600                  | H                                               | -3.68011600 | -2.79855100 | -2.43453300                  |
| H                                                                           | -1.31155500 | -0.02911900 | -3.11994700                  | H                                               | -1.18867200 | -1.01335500 | -2.74505100                  |
| H                                                                           | -2.61791200 | -0.78802900 | -4.03187900                  | H                                               | -1.43854000 | -2.60474400 | -3.47343500                  |
| C                                                                           | -4.02839100 | -1.88747400 | 0.70821000                   | C                                               | -1.13832200 | -3.79607600 | 1.44941900                   |
| C                                                                           | -4.10259200 | -2.69516900 | -0.59097700                  | C                                               | -0.98484400 | -4.60647800 | 0.16731800                   |
| C                                                                           | -3.86621500 | -1.86673900 | -1.85666200                  | C                                               | -1.57111100 | -3.89853900 | -1.04597400                  |
| H                                                                           | -4.54024700 | -0.93325600 | 0.56179100                   | H                                               | -2.17405400 | -3.45252200 | 1.53641900                   |
| H                                                                           | -4.55908800 | -2.41814000 | 1.50946800                   | H                                               | -0.92881100 | -4.42989800 | 2.32013900                   |
| H                                                                           | -3.45653600 | -3.57991300 | -0.55714200                  | H                                               | 0.04383700  | -4.94075600 | 0.00269100                   |
| H                                                                           | -5.12260700 | -3.09094900 | -0.66213200                  | H                                               | -1.56586900 | -5.52623500 | 0.30381000                   |
| H                                                                           | -4.52961900 | -1.00343800 | -1.83338600                  | H                                               | -2.60314700 | -3.63970600 | -0.81996100                  |
| H                                                                           | -4.13036400 | -2.45428200 | -2.74725900                  | H                                               | -1.57590100 | -4.57051700 | -1.91491100                  |
| C                                                                           | 3.15416300  | 2.26352600  | -1.99801700                  | C                                               | 0.78237800  | 3.96478400  | -1.60369200                  |
| C                                                                           | 2.81497500  | 2.87603300  | 0.46208500                   | C                                               | 0.45106500  | 4.19031500  | 0.88480000                   |
| C                                                                           | 3.77077900  | 2.84036200  | -0.72477200                  | C                                               | 1.35579800  | 4.50059300  | -0.29863700                  |
| H                                                                           | 4.02130300  | 3.88443800  | -0.94808800                  | H                                               | 1.40281900  | 5.59199800  | -0.38890600                  |
| H                                                                           | 4.72625700  | 2.36889400  | -0.47546400                  | H                                               | 2.38833000  | 4.17483900  | -0.13602400                  |
| H                                                                           | 2.15254500  | 2.68634500  | -2.13084800                  | H                                               | -0.27321600 | 4.24611400  | -1.67664900                  |
| H                                                                           | 3.74946700  | 2.56672700  | -2.87067700                  | H                                               | 1.29833900  | 4.41521800  | -2.46091900                  |
| H                                                                           | 3.25358300  | 3.48206800  | 1.26855900                   | H                                               | 0.77186900  | 4.74773700  | 1.77396400                   |
| H                                                                           | 1.90003400  | 3.37956500  | 0.14675600                   | H                                               | -0.55913300 | 4.51739400  | 0.63600000                   |
| C                                                                           | 4.26444600  | -2.00991400 | -0.79804400                  | C                                               | 4.10050500  | 0.33202700  | -2.57785700                  |
| C                                                                           | 4.51257300  | -1.33865300 | -2.15020700                  | C                                               | 2.62115300  | 0.78878700  | -2.66241400                  |

|   |             |             |             |   |             |             |             |
|---|-------------|-------------|-------------|---|-------------|-------------|-------------|
| C | 4.38796600  | 0.18333100  | -2.17157900 | C | 2.32265700  | 2.06956900  | -1.87709800 |
| H | 4.61670500  | -3.05183800 | -0.85513500 | H | 4.31225800  | -0.21897300 | -3.49824000 |
| H | 5.55902800  | -1.55021700 | -2.40299500 | H | 2.37945700  | 0.96152600  | -3.71675600 |
| H | 4.81806400  | 0.56506300  | -3.10870800 | H | 2.85910700  | 2.90450900  | -2.34591700 |
| H | 4.87918300  | -1.50991200 | -0.04123900 | H | 4.77764100  | 1.20478900  | -2.59092800 |
| H | 3.93559000  | -1.80418200 | -2.95474600 | H | 1.99232900  | -0.02816600 | -2.30339900 |
| H | 4.99365600  | 0.58720400  | -1.35763200 | H | 2.69752000  | 1.98792300  | -0.85417200 |
| C | -0.63011000 | 5.01008500  | 1.93058300  | C | -4.13813700 | 3.71198800  | 0.59020800  |
| C | -1.78354600 | 4.63954500  | 1.24511500  | C | -4.72453300 | 2.48186900  | 0.28463400  |
| C | 0.35728800  | 4.06067000  | 2.18608200  | C | -2.88688700 | 3.76004300  | 1.20441100  |
| C | 0.22328900  | 2.74254500  | 1.72449400  | C | -2.18943900 | 2.57195500  | 1.48349600  |
| C | -1.97022900 | 3.31612300  | 0.82005400  | C | -4.07667900 | 1.28376100  | 0.60913600  |
| C | -3.35452100 | 2.95947300  | 0.30804100  | C | -4.79973000 | -0.03996500 | 0.46596600  |
| C | 1.31987700  | 1.74923100  | 2.06018300  | C | -0.84650700 | 2.56778800  | 2.18093000  |
| H | -0.50833900 | 6.03069500  | 2.28038700  | H | -4.67110800 | 4.63337600  | 0.37596000  |
| H | -2.56403200 | 5.37575200  | 1.06917700  | H | -5.71092800 | 2.45590200  | -0.17114900 |
| H | 1.23973900  | 4.34673900  | 2.75269200  | H | -2.48046700 | 4.72284800  | 1.50294200  |
| H | 1.81425100  | 2.10157800  | 2.97515900  | H | -0.78614100 | 3.36919400  | 2.92774300  |
| H | 0.91294200  | 0.75891000  | 2.26889000  | H | -0.70045800 | 1.61680200  | 2.69014900  |
| C | -0.95050000 | 2.38476500  | 1.03885200  | C | -2.81078200 | 1.34806500  | 1.19716700  |
| H | -3.77597500 | 3.84739900  | -0.19644800 | H | -5.76127700 | 0.13864000  | -0.04772800 |
| H | -3.98224200 | 2.80201100  | 1.19476400  | H | -5.05331000 | -0.39632000 | 1.47200000  |
| H | -1.08135900 | 1.36909300  | 0.69252400  | H | -2.30517500 | 0.42832100  | 1.46106800  |
| C | 3.57901700  | 0.96467200  | 1.75185800  | C | 1.58566700  | 2.36941000  | 2.04994500  |
| H | 3.26147100  | 0.04898100  | 2.25275700  | H | 1.56311000  | 1.30284300  | 2.26982100  |
| H | 4.38982900  | 0.72720200  | 1.06009600  | H | 2.48289300  | 2.59710600  | 1.47165200  |
| H | 3.96253500  | 1.66323500  | 2.50857500  | H | 1.61772000  | 2.94226900  | 2.98384100  |
| C | 2.02614100  | -2.78707300 | -1.24804900 | C | 5.32628500  | -1.64073900 | -1.79436800 |
| H | 0.98067700  | -2.72520800 | -0.96658400 | H | 5.39791100  | -2.33698100 | -0.95284200 |
| H | 2.11281100  | -2.38573200 | -2.25662600 | H | 4.97447400  | -2.20213300 | -2.66534400 |
| H | 2.33868100  | -3.84198100 | -1.27118900 | H | 6.34012700  | -1.26284900 | -2.01002100 |
| C | -2.78074500 | -0.47130100 | 2.21119600  | C | -0.70416000 | -1.85936700 | 2.79825800  |
| H | -3.19714600 | 0.40784000  | 1.71973300  | H | -1.74549000 | -1.55158100 | 2.68875700  |
| H | -3.44615600 | -0.78321400 | 3.02692000  | H | -0.61760800 | -2.53430100 | 3.65796600  |
| H | -1.80378300 | -0.22219800 | 2.62349300  | H | -0.07964600 | -0.98401800 | 2.95295100  |
| C | -5.00766200 | 1.59288800  | -0.65162600 | C | -4.94253700 | -2.32661700 | -0.09387300 |
| H | -5.50281800 | 2.46456400  | -1.11251700 | H | -5.91453500 | -2.18069100 | -0.59627900 |
| H | -5.27058200 | 0.71284600  | -1.23795700 | H | -4.47887700 | -3.21520400 | -0.52553300 |
| H | -5.42773100 | 1.46122700  | 0.34972900  | H | -5.13647400 | -2.53461300 | 0.96242600  |
| C | -1.61107200 | -2.49997800 | -2.47281300 | C | 0.47259000  | -2.95117600 | -2.00094800 |
| H | -1.97155600 | -2.88831100 | -3.43397800 | H | 0.39030100  | -3.66372000 | -2.82966700 |
| H | -0.58621200 | -2.14938900 | -2.58672800 | H | 0.93171600  | -2.03000000 | -2.35860000 |
| H | -1.63027000 | -3.31578800 | -1.74647100 | H | 1.10751900  | -3.38791600 | -1.23031200 |
| C | 2.23029300  | 0.46113800  | -3.27621100 | C | 0.09168800  | 2.14635000  | -3.00612000 |
| H | 1.24682800  | 0.92723200  | -3.20187300 | H | -0.93446700 | 2.49983300  | -2.88675300 |
| H | 2.74836400  | 0.84996100  | -4.16285800 | H | 0.54427100  | 2.64612100  | -3.87036200 |
| H | 2.09812300  | -0.61389400 | -3.39171300 | H | 0.07821600  | 1.07180400  | -3.16237600 |
| C | -2.09192500 | -2.80321700 | 1.89938200  | C | 1.17801400  | -3.03550300 | 1.73990000  |
| C | 2.88861300  | -2.72686800 | 1.02533800  | C | 4.70783700  | 0.05678500  | -0.18660500 |
| C | 0.86247500  | -1.97983100 | 4.16945900  | C | 3.70011000  | -0.72458300 | 3.42026900  |
| C | -0.44646700 | -2.20767100 | 3.74806600  | C | 2.64065500  | -1.61806200 | 3.23901400  |
| C | 1.92218100  | -2.13179900 | 3.27129500  | C | 4.36718800  | -0.19556800 | 2.31591300  |
| C | -0.69245900 | -2.63785400 | 2.43628700  | C | 2.24019400  | -1.98057200 | 1.94694800  |
| C | 1.70267500  | -2.57190300 | 1.95738500  | C | 3.98140700  | -0.54570800 | 1.01310000  |
| C | 0.38873200  | -2.88195700 | 1.58824600  | C | 2.92542500  | -1.44331700 | 0.84751100  |
| H | 1.05928700  | -1.67429600 | 5.19248700  | H | 4.02255500  | -0.46576500 | 4.42448500  |
| H | -1.27136300 | -2.06206800 | 4.44035500  | H | 2.15479000  | -2.05640500 | 4.10711700  |
| H | 2.93646000  | -1.93385700 | 3.60996600  | H | 5.20996300  | 0.47555400  | 2.46796700  |
| H | 0.18154000  | -3.31228200 | 0.61570300  | H | 2.67280300  | -1.73419800 | -0.16827700 |
| H | -2.79203200 | -3.05437900 | 2.70694500  | H | 1.16555000  | -3.71870400 | 2.59865000  |

|               |             |            |              |             |             |
|---------------|-------------|------------|--------------|-------------|-------------|
| H -2.12185200 | -3.61886300 | 1.17213400 | H 1.42903300 | -3.63208300 | 0.86240900  |
| H 3.77445300  | -2.36658900 | 1.55404700 | H 4.46575700 | 1.12565500  | -0.23901000 |
| H 3.06928900  | -3.79364300 | 0.81548600 | H 5.79442100 | 0.02411500  | 0.00116300  |

## References

- (1) M. Costas, R. Xifra, A. Llobet, M. Solà, J. Robles, T. Parella, H. Stoeckli-Evans, M. Neuburger, *Inorg. Chem.*, **2003**, *42*, 4456.
- (2) A. D. Becke, *J. Chem. Phys.*, **1993**, *98*, 5648. (b) C. Lee, W. Yang, R. G. Parr, *Phys. Rev. B*, **1988**, *37*, 785. (c) P. J. Stevens, J. Devlin, C. F. Chablowski, M. J. Frisch, *J. Phys. Chem.*, **1994**, *98*, 11623.
- (3) W. J. Hehre, L. Radom, P. v. R. Schleyer, J. A. Pople, *Ab Initio Molecular Orbital Theory*; Wiley: New York, 1986.
- (4) M. J. Frisch, G. W. Trucks, H. B. Schlegel, G. E. Scuseria, M. A. Robb, J. R. Cheeseman, J. J. A. Montgomery, T. Vreven, K. N. Kudin, J. C. Burant, J. M. Millam, S. S. Iyengar, J. Tomasi, V. Barone, B. Mennucci, M. Cossi, G. Scalmani, N. Rega, G. A. Petersson, H. Nakatsuji, M. Hada, M. Ehara, K. Toyota, R. Fukuda, J. Hasegawa, M. Ishida, T. Nakajima, Y. Honda, O. Kitao, H. Nakai, M. Klene, X. Li, J. E. Knox, H. P. Hratchian, J. B. Cross, C. Adamo, J. Jaramillo, R. Gomperts, R. E. Stratmann, O. Yazyev, A. J. Austin, R. Cammi, C. Pomelli, J. W. Ochterski, P. Y. Ayala, K. Morokuma, G. A. Voth, P. Salvador, J. J. Dannenberg, V. G. Zakrzewski, S. Dapprich, A. D. Daniels, M. C. Strain, Ö. Farkas, D. K. Malick, A. D. Rabuck, K. Raghavachari, J. B. Foresman, J. V. Ortiz, Q. Cui, A. G. Baboul, S. Clifford, J. Cioslowski, B. B. Stefanov, G. Liu, A. Liashenko, P. Piskorz, I. Komaromi, R. L. Martin, D. J. Fox, T. Keith, M. A. Al-Laham, C. Y. Peng, A. Nanayakkara, M. Challacombe, P. M. W. Gill, B. Johnson, W. Chen, M. W. Wong, C. Gonzalez, J. A. Pople, *Gaussian 03*; Gaussian, Inc.: Wallingford, CT, 2004.
